# Supplementary material
Source: Springer Nature journal article supplement (https://www.springermedizin.de/resource/supplementary/12974_2008_134_MOESM7_ESM.pdf/9600846)

**A**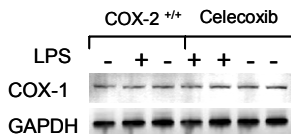**B**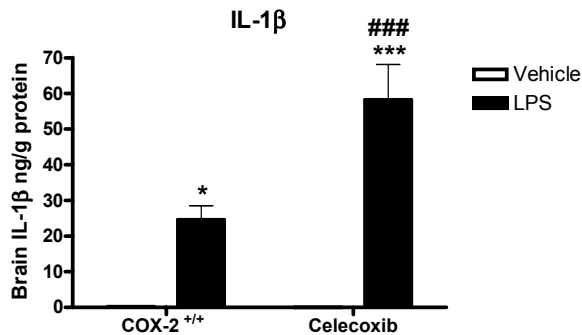**C**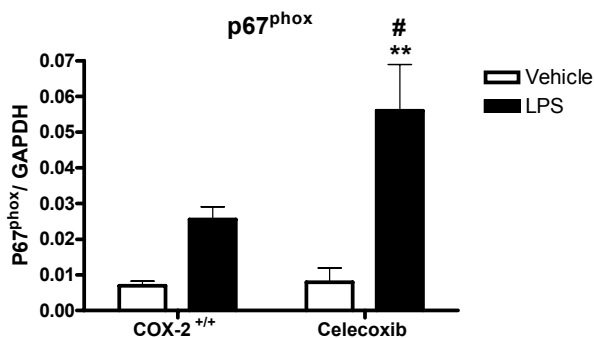**E**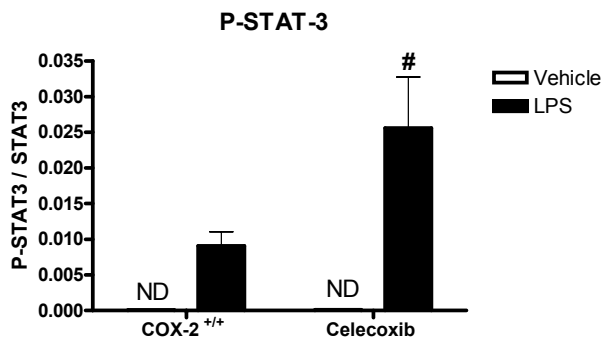**D**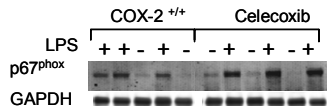**F**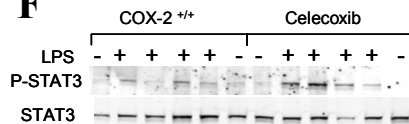

Supplement: MOESM7 [file 9600846]
